# Supplementary material
Source: MDPI journal article supplement (https://www.mdpi.com/2071-1050/13/24/14023)
Supplement: s1 [file s1]

## Supplement S1. Descriptive statistics of explanatory variables

Table S1. Descriptive statistics of explanatory variables (continuous variables) for analysis 1  
(All roads)

| Variable                            |                                        | Min. | 1st Qu. | Median | Mean   | 3rd Qu. | Max.   |
|-------------------------------------|----------------------------------------|------|---------|--------|--------|---------|--------|
| Distance to                         | the main station in the prefecture (m) | 207  | 11,094  | 15,824 | 17,048 | 21,849  | 69,414 |
|                                     | the nearest station (m)                | 1    | 478     | 787    | 930    | 1,213   | 6,373  |
|                                     | the nearest bus station (m)            | 0    | 83      | 148    | 176    | 236     | 1,694  |
|                                     | the nearest elementary school (m)      | 1    | 258     | 403    | 437    | 575     | 2,427  |
|                                     | the nearest junior high school (m)     | 1    | 376     | 589    | 639    | 848     | 3,603  |
|                                     | the nearest hospital (m)               | 0    | 109     | 200    | 235    | 322     | 3,837  |
|                                     | the nearest post office (m)            | 0    | 269     | 417    | 459    | 600     | 2,993  |
|                                     | the nearest clinic (m)                 | 0    | 112     | 206    | 242    | 333     | 3,837  |
| Maximum building coverage ratio (%) |                                        | 30   | 50      | 60     | 58     | 60      | 80     |

Table S2. Descriptive statistic of explanatory variables (continuous variables) for analysis 1  
(Roads with undergrounded lines)

| Variable                            |                                        | Min.  | 1st Qu. | Median | Mean   | 3rd Qu. | Max.   |
|-------------------------------------|----------------------------------------|-------|---------|--------|--------|---------|--------|
| Distance to                         | the main station in the prefecture (m) | 1,230 | 12,663  | 20,390 | 19,415 | 23,899  | 53,033 |
|                                     | the nearest station (m)                | 8     | 390     | 646    | 915    | 1,034   | 5,511  |
|                                     | the nearest bus station (m)            | 0     | 27      | 105    | 146    | 209     | 900    |
|                                     | the nearest elementary school (m)      | 7     | 210     | 375    | 436    | 621     | 1,403  |
|                                     | the nearest junior high school (m)     | 22    | 281     | 475    | 584    | 823     | 2,011  |
|                                     | the nearest hospital (m)               | 1     | 85      | 163    | 22     | 317     | 958    |
|                                     | the nearest post office (m)            | 12    | 246     | 420    | 576    | 757     | 2,876  |
|                                     | the nearest clinic (m)                 | 1     | 88      | 168    | 224    | 319     | 958    |
| Maximum building coverage ratio (%) |                                        | 30    | 50      | 60     | 55     | 60      | 80     |

Table S3. Descriptive statistics of explanatory variables (dummy variables) for analysis 1  
(All roads)

| Variable                                                                             | No (0)  | Yes (1) |
|--------------------------------------------------------------------------------------|---------|---------|
| Landscape planning area                                                              | 7,045   | 287,460 |
| Landscape emphasis planning area                                                     | 281,961 | 12,544  |
| Each of the following seven residential districts are considered as a dummy variable |         |         |
| ( i )Category 1 low-rise exclusive residential districts                             | 161,942 | 132,563 |
| ( ii )Category 2 low-rise exclusive residential districts                            | 290,878 | 3,627   |
| (iii)Category 1 medium-to-high-rise exclusive residential districts                  | 231,843 | 62,662  |
| (iv)Category 2 medium-to-high-rise exclusive residential districts                   | 283,732 | 10,773  |
| ( v )Category 1 residential districts                                                | 225,920 | 68,585  |
| (vi)Category 2 residential districts                                                 | 283,602 | 10,903  |
| (vii)Quasi-residential districts                                                     | 289,113 | 5,392   |
| New towns developed after 1976                                                       | 260,352 | 34,153  |
| New towns developed before 1976                                                      | 271,100 | 23,405  |

Table S4. Descriptive statistics of explanatory variables (dummy variables) for analysis 1  
(All roads)

| Variable                                                                             | No (0) | Yes (1) |
|--------------------------------------------------------------------------------------|--------|---------|
| Landscape planning area                                                              | 72     | 762     |
| Landscape emphasis planning area                                                     | 640    | 194     |
| Each of the following seven residential districts are considered as a dummy variable |        |         |
| ( i )Category 1 low-rise exclusive residential districts                             | 614    | 220     |
| ( ii )Category 2 low-rise exclusive residential districts                            | 823    | 11      |
| (iii)Category 1 medium-to-high-rise exclusive residential districts                  | 661    | 173     |
| (iv)Category 2 medium-to-high-rise exclusive residential districts                   | 789    | 45      |
| ( v )Category 1 residential districts                                                | 636    | 198     |
| (vi)Category 2 residential districts                                                 | 737    | 97      |
| (vii)Quasi-residential districts                                                     | 744    | 90      |
| New towns developed after 1976                                                       | 640    | 194     |
| New towns developed before 1976                                                      | 755    | 79      |

Table S5. Descriptive statistics of explanatory variables (continuous variables) for analysis 2  
(All roads)

| Variable                            |                                        | Min. | 1st Qu. | Median | Mean   | 3rd Qu. | Max.    |
|-------------------------------------|----------------------------------------|------|---------|--------|--------|---------|---------|
| Distance to                         | the main station in the prefecture (m) | 20   | 9,089   | 15,218 | 22,582 | 24,924  | 251,781 |
|                                     | the nearest station (m)                | 0    | 494     | 833    | 1,057  | 1,353   | 33,116  |
|                                     | the nearest bus station (m)            | 0    | 93      | 162    | 209    | 257     | 5,556   |
|                                     | the nearest elementary school (m)      | 1    | 276     | 432    | 476    | 624     | 5,815   |
|                                     | the nearest junior high school (m)     | 1    | 412     | 648    | 713    | 937     | 5,926   |
|                                     | the nearest hospital (m)               | 0    | 236     | 505    | 700    | 970     | 10,188  |
|                                     | the nearest post office (m)            | 0    | 264     | 415    | 466    | 610     | 2,993   |
|                                     | the nearest clinic (m)                 | 0    | 114     | 209    | 251    | 340     | 3,836   |
| Maximum building coverage ratio (%) |                                        | 30   | 50      | 60     | 57     | 60      | 80      |

Table S6. Descriptive statistics of explanatory variables (continuous variables) for analysis 2  
(Roads with undergrounded lines)

| Variable                            |                                        | Min. | 1st Qu. | Median | Mean   | 3rd Qu. | Max.   |
|-------------------------------------|----------------------------------------|------|---------|--------|--------|---------|--------|
| Distance to                         | the main station in the prefecture (m) | 901  | 10,352  | 19,249 | 19,841 | 23,933  | 12,369 |
|                                     | the nearest station (m)                | 8    | 429     | 769    | 1,064  | 1,273   | 7,426  |
|                                     | the nearest bus station (m)            | 0    | 27      | 98     | 139    | 199     | 1,225  |
|                                     | the nearest elementary school (m)      | 7    | 220     | 398    | 445    | 630     | 1,502  |
|                                     | the nearest junior high school (m)     | 21   | 331     | 601    | 660    | 925     | 2,011  |
|                                     | the nearest hospital (m)               | 1    | 133     | 319    | 578    | 760     | 4,141  |
|                                     | the nearest post office (m)            | 8    | 238     | 430    | 562    | 741     | 2,876  |
|                                     | the nearest clinic (m)                 | 1    | 83      | 167    | 226    | 317     | 1,224  |
| Maximum building coverage ratio (%) |                                        | 30   | 50      | 60     | 56     | 60      | 80     |

Table S7. Descriptive statistics of explanatory variables (dummy variables) for analysis 2  
(All roads)

| Variable                                                                                | No (0)  | Yes (1) |
|-----------------------------------------------------------------------------------------|---------|---------|
| Landscape planning area                                                                 | 197,990 | 670,018 |
| Landscape emphasis planning area                                                        | 848,822 | 19,186  |
| Each of the following seven residential districts are<br>considered as a dummy variable |         |         |
| ( i )Category 1 low-rise exclusive residential districts                                | 606,013 | 261,995 |
| ( ii )Category 2 low-rise exclusive residential districts                               | 857,403 | 10,605  |
| ( iii )Category 1 medium-to-high-rise exclusive residential districts                   | 694,383 | 173,625 |
| ( iv )Category 2 medium-to-high-rise exclusive residential districts                    | 790,493 | 77,515  |
| ( v )Category 1 residential districts                                                   | 595,518 | 272,490 |
| ( vi )Category 2 residential districts                                                  | 816,134 | 51,874  |
| ( vii )Quasi-residential districts                                                      | 848,104 | 19,904  |
| New towns developed after 1976                                                          | 812,620 | 55,388  |
| New towns developed before 1976                                                         | 815,269 | 52,739  |

Table S8. Descriptive statistics of explanatory variables (dummy variables) for analysis 2  
(Roads with undergrounded lines)

| Variable                                                                                | No (0) | Yes (1) |
|-----------------------------------------------------------------------------------------|--------|---------|
| Landscape planning area                                                                 | 307    | 1,157   |
| Landscape emphasis planning area                                                        | 1,230  | 234     |
| Each of the following seven residential districts are<br>considered as a dummy variable | 1,136  | 328     |
| ( i )Category 1 low-rise exclusive residential districts                                | 1,136  | 328     |
| ( ii )Category 2 low-rise exclusive residential districts                               | 1,412  | 52      |
| ( iii )Category 1 medium-to-high-rise exclusive residential districts                   | 1,225  | 239     |
| ( iv )Category 2 medium-to-high-rise exclusive residential districts                    | 1,385  | 79      |
| ( v )Category 1 residential districts                                                   | 1,072  | 392     |
| ( vi )Category 2 residential districts                                                  | 1,255  | 209     |
| ( vii )Quasi-residential districts                                                      | 1,299  | 165     |
| New towns developed after 1976                                                          | 1,169  | 295     |
| New towns developed before 1976                                                         | 1,373  | 91      |

## **Supplement S2. Regression coefficients of explanatory variables**

We show regression coefficients of explanatory variables for analysis 1 and analysis 2. In analysis 1, the regression coefficients are almost the same, not depending on the threshold.

Table S9. Regression coefficients for analysis 1 in linear functional form

| Variables                                                             | FAR threshold of 2 |                |
|-----------------------------------------------------------------------|--------------------|----------------|
|                                                                       | Coefficient        | P value        |
| Intercept                                                             | 144819             | 0.00.E+00 ***  |
| the main station in the prefecture                                    | -3                 | 0.00.E+00 ***  |
| the nearest station                                                   | -18                | 0.00.E+00 ***  |
| the nearest bus station                                               | -5                 | 4.34.E-35 ***  |
| the nearest elementary school                                         | -2                 | 1.26.E-11 ***  |
| Distance to the nearest junior high school                            | -3                 | 2.37.E-92 ***  |
| the nearest hospital                                                  | -12                | 1.65.E-21 ***  |
| the nearest post office                                               | -6                 | 1.02.E-175 *** |
| the nearest clinic                                                    | -10                | 5.49.E-17 ***  |
| Maximum building coverage ratio                                       | -184               | 3.70.E-36 ***  |
| Maximum floor area ratio                                              | 146                | 0.00.E+00 ***  |
| ( i )Category 1 low-rise exclusive residential districts              |                    |                |
| ( ii )Category 2 low-rise exclusive residential districts             | -7912              | 5.92.E-60 ***  |
| ( iii )Category 1 medium-to-high-rise exclusive residential districts | -8035              | 2.57.E-273 *** |
| ( iv )Category 2 medium-to-high-rise exclusive residential districts  | -5219              | 1.20.E-53 ***  |
| ( v )Category 1 residential districts                                 | -9497              | 7.08.E-306 *** |
| ( vi )Category 2 residential districts                                | -4224              | 1.43.E-32 ***  |
| ( vii )Quasi-residential districts                                    | -7915              | 3.95.E-69 ***  |
| New towns developed after 1976                                        | 8516               | 1.45.E-198 *** |
| New towns developed before 1976                                       | -5376              | 1.45.E-59 ***  |
| Landscape planning area                                               | -2184              | 4.64.E-01      |
| Landscape emphasis planning area                                      | -5876              | 2.59.E-99 ***  |
| Narrow                                                                | -                  | -              |
| Medium                                                                | 6248               | 0.00.E+00 ***  |
| Wide                                                                  | 15487              | 1.13.E-153 *** |
| UGUL                                                                  | 33459              | 8.13.E-31 ***  |
| Neighborhood                                                          | 5557               | 8.20.E-27 ***  |
| (Wide/Medium)                                                         | -20849             | 9.08.E-09 ***  |
| (High)                                                                | -10907             | 1.14.E-04 ***  |
| (Wide/Medium and High)                                                | 20192              | 2.68.E-06 ***  |
| (Prefecture dummy of Saitama)                                         | -10076             | 1.38.E-02 *    |
| (Prefecture dummy of Chiba)                                           | -17947             | 8.63.E-09 ***  |
| (Prefecture dummy of Tokyo)                                           | -6833              | 1.40.E-02 *    |
| (Prefecture dummy of Kanagawa)                                        | -                  | -              |
| <i>Sample size</i>                                                    | 294,504            |                |
| R-squared                                                             | 0.932              |                |
| P value of F-Statistic                                                | 2.20.E-16          |                |

Table S10. Regression coefficients for analysis 1 in semi-log functional form

| Variables                                                             | FAR threshold of 2 |                |
|-----------------------------------------------------------------------|--------------------|----------------|
|                                                                       | Coefficient        | P value        |
| Intercept                                                             | 11.92              | 0.00.E+00 ***  |
| the main station in the prefecture                                    | -1.91E-05          | 0.00.E+00 ***  |
| the nearest station                                                   | -1.36.E-04         | 0.00.E+00 ***  |
| the nearest bus station                                               | -5.48E-06          | 2.52.E-02 *    |
| the nearest elementary school                                         | -3.12E-05          | 2.63.E-106 *** |
| the nearest junior high school                                        | -3.10E-05          | 4.27.E-220 *** |
| the nearest hospital                                                  | -9.99E-05          | 1.21.E-40 ***  |
| the nearest post office                                               | -5.70E-05          | 0.00.E+00 ***  |
| the nearest clinic                                                    | -1.04.E-04         | 3.04.E-46 ***  |
| Maximum building coverage ratio                                       | -1.62.E-03         | 3.29.E-72 ***  |
| Maximum floor area ratio                                              | 4.95.E-04          | 3.31.E-263 *** |
| ( i )Category 1 low-rise exclusive residential districts              |                    |                |
| ( ii )Category 2 low-rise exclusive residential districts             | -3.86.E-03         | 1.94.E-01      |
| ( iii )Category 1 medium-to-high-rise exclusive residential districts | 1.31.E-03          | 3.46.E-01      |
| ( iv )Category 2 medium-to-high-rise exclusiveresidential districts   | 2.16.E-02          | 2.01.E-25 ***  |
| ( v )Category 1 residential districts                                 | -7.41.E-03         | 1.91.E-06 ***  |
| ( vi )Category 2 residential districts                                | 4.67.E-02          | 5.42.E-102 *** |
| ( vii )Quasi-residential districts                                    | 1.03.E-02          | 1.80.E-04 ***  |
| New towns developed after 1976                                        | 6.92.E-02          | 0.00.E+00 ***  |
| New towns developed before 1976                                       | -3.75.E-02         | 1.91.E-76 ***  |
| Landscape planning area                                               | 4.64.E-03          | 8.00.E-01      |
| Landscape emphasis planning area                                      | 1.08.E-03          | 5.23.E-01      |
| Narrow                                                                |                    |                |
| Medium                                                                | 4.11.E-02          | 0.00.E+00 ***  |
| Wide                                                                  | 1.02.E-01          | 3.70.E-176 *** |
| UGUL                                                                  | 0.2320             | 2.58.E-57 ***  |
| Neighborhood                                                          | 0.0590             | 8.83.E-77 ***  |
| (Wide/Medium)                                                         | -0.1130            | 3.05.E-07 ***  |
| (High)                                                                | -0.0515            | 2.53.E-03 **   |
| (Wide/Medium and High)                                                | 0.0627             | 1.70.E-02 *    |
| (Prefecture dummy of Saitama)                                         |                    |                |
| (Prefecture dummy of Chiba)                                           |                    |                |
| (Prefecture dummy of Tokyo)                                           | -0.1281            | 9.64.E-28 ***  |
| (Prefecture dummy of Kanagawa)                                        |                    |                |
| <i>Sample size</i>                                                    | 294,504            |                |
| R-squared                                                             | 0.932              |                |
| P value of F-Statistic                                                | 2.20.E-16          |                |

Table S11. Regression coefficients for analysis 1 in full log functional form

| Variables                                                             | FAR threshold of 2 |                |
|-----------------------------------------------------------------------|--------------------|----------------|
|                                                                       | Coefficient        | P value        |
| Intercept                                                             | 1.51.E+01          | 0.00.E+00 ***  |
| the main station in the prefecture                                    | -2.80.E-01         | 0.00.E+00 ***  |
| the nearest station                                                   | -1.07.E-01         | 0.00.E+00 ***  |
| the nearest bus station                                               | -1.08.E-03         | 4.46.E-04 ***  |
| the nearest elementary school                                         | -1.62.E-02         | 1.74.E-212 *** |
| the nearest junior high school                                        | -1.91.E-02         | 4.25.E-295 *** |
| the nearest hospital                                                  | -1.50.E-02         | 1.06.E-16 ***  |
| the nearest post office                                               | -1.59.E-02         | 1.08.E-229 *** |
| the nearest clinic                                                    | -1.63.E-02         | 1.08.E-19 ***  |
| Maximum building coverage ratio                                       | -1.03.E-01         | 9.81.E-87 ***  |
| Maximum floor area ratio                                              | 7.99.E-02          | 8.88.E-200 *** |
| ( i )Category 1 low-rise exclusive residential districts              |                    |                |
| ( ii )Category 2 low-rise exclusive residential districts             | -7.31.E-03         | 1.59.E-02 *    |
| ( iii )Category 1 medium-to-high-rise exclusive residential districts | -6.02.E-03         | 7.90.E-05 ***  |
| ( iv )Category 2 medium-to-high-rise exclusive residential districts  | 1.29.E-02          | 2.93.E-09 ***  |
| ( v )Category 1 residential districts                                 | -1.65.E-02         | 1.19.E-22 ***  |
| ( vi )Category 2 residential districts                                | 4.12.E-02          | 3.41.E-72 ***  |
| ( vii )Quasi-residential districts                                    | 8.35.E-03          | 3.65.E-03 **   |
| New towns developed after 1976                                        | 4.57.E-02          | 1.15.E-148 *** |
| New towns developed before 1976                                       | -1.18.E-02         | 8.70.E-09 ***  |
| Landscape planning area                                               | 7.24.E-04          | 9.69.E-01      |
| Landscape emphasis planning area                                      | -1.99.E-03         | 2.49.E-01      |
| Narrow                                                                |                    |                |
| Medium                                                                | 3.96.E-02          | 0.00.E+00 ***  |
| Wide                                                                  | 9.89.E-02          | 1.11.E-159 *** |
|                                                                       |                    | ***            |
| UGUL                                                                  | 0.1212             | 2.35.E-13 ***  |
| Neighborhood                                                          | 0.0632             | 3.93.E-85 ***  |
| (Wide/Medium)                                                         | -0.0681            | 2.43.E-03 **   |
| (High)                                                                | 0.0052             | 7.67.E-01      |
| (Wide/Medium and High)                                                | 0.0351             | 1.88.E-01      |
| (Prefecture dummy of Saitama)                                         | -                  | -              |
| (Prefecture dummy of Chiba)                                           | 0.0488             | 4.17.E-03 **   |
| (Prefecture dummy of Tokyo)                                           | -0.0699            | 2.29.E-06 ***  |
| (Prefecture dummy of Kanagawa)                                        | -                  | -              |
| <i>Sample size</i>                                                    | 294,504            |                |
| R-squared                                                             | 0.930              |                |
| P value of F-Statistic                                                | 2.20.E-16          |                |



Table S12. The regression coefficients of explanatory variables for analysis 2

| Variables                                                             | Linear      |                | Semi Log    |                | Full Log    |                |
|-----------------------------------------------------------------------|-------------|----------------|-------------|----------------|-------------|----------------|
|                                                                       | Coefficient | P value        | Coefficient | P value        | Coefficient | P value        |
| Intercept                                                             | 63560       | 0.00.E+00 ***  | 1.10.E+01   | 0.00.E+00 ***  | 1.36.E+01   | 0.00.E+00 ***  |
| the main station in the prefecture                                    | -2          | 0.00.E+00 ***  | -2.01.E-05  | 0.00.E+00 ***  | -2.44.E-01  | 0.00.E+00 ***  |
| the nearest station                                                   | -7          | 0.00.E+00 ***  | -8.19.E-05  | 0.00.E+00 ***  | -7.66.E-02  | 0.00.E+00 ***  |
| the nearest bus station                                               | -2          | 4.37.E-71 ***  | -3.75.E-05  | 2.77.E-234 *** | -6.59.E-03  | 4.78.E-226 *** |
| the nearest elementary school                                         | -2          | 2.89.E-61 ***  | -4.09.E-05  | 0.00.E+00 ***  | -2.12.E-02  | 0.00.E+00 ***  |
| the nearest junior high school                                        | -3          | 0.00.E+00 ***  | -3.73.E-05  | 0.00.E+00 ***  | -2.65.E-02  | 0.00.E+00 ***  |
| the nearest hospital                                                  | -1          | 1.16.E-177 *** | -3.65.E-05  | 0.00.E+00 ***  | -1.79.E-02  | 0.00.E+00 ***  |
| the nearest post office                                               | -5          | 0.00.E+00 ***  | -5.39.E-05  | 0.00.E+00 ***  | -1.67.E-02  | 0.00.E+00 ***  |
| the nearest clinic                                                    | -18         | 0.00.E+00 ***  | -2.29.E-04  | 0.00.E+00 ***  | -4.00.E-02  | 0.00.E+00 ***  |
| Maximum building coverage ratio                                       | 38          | 6.38.E-08 ***  | 1.63.E-03   | 3.58.E-152 *** | 7.83.E-02   | 6.01.E-105 *** |
| Maximum floor area ratio                                              | 87          | 0.00.E+00 ***  | 2.33.E-04   | 7.90.E-99 ***  | 3.28.E-02   | 9.08.E-64 ***  |
| ( i )Category 1 low-rise exclusive residential districts              |             |                |             |                |             |                |
| ( ii )Category 2 low-rise exclusive residential districts             | -2274       | 1.10.E-25 ***  | -1.54.E-03  | 4.26.E-01      | -9.50.E-03  | 1.22.E-06 ***  |
| ( iii )Category 1 medium-to-high-rise exclusive residential districts | -7465       | 0.00.E+00 ***  | -3.13.E-02  | 4.57.E-164 *** | -2.72.E-02  | 3.82.E-105 *** |
| ( iv )Category 2 medium-to-high-rise exclusive residential districts  | -6954       | 0.00.E+00 ***  | -8.65.E-03  | 6.66.E-11 ***  | -4.54.E-03  | 1.64.E-03 **   |
| ( v )Category 1 residential districts                                 | -10087      | 0.00.E+00 ***  | -5.52.E-02  | 0.00.E+00 ***  | -5.55.E-02  | 0.00.E+00 ***  |
| ( vi )Category 2 residential districts                                | -5788       | 1.30.E-261 *** | 1.53.E-02   | 1.02.E-24 ***  | 6.50.E-03   | 3.84.E-05 ***  |
| ( vii )Quasi-residential districts                                    | -8090       | 0.00.E+00 ***  | -2.08.E-03  | 2.62.E-01      | 3.19.E-03   | 9.89.E-02      |
| New towns developed after 1976                                        | 2994        | 4.84.E-169 *** | 3.65.E-02   | 0.00.E+00 ***  | 2.94.E-02   | 1.99.E-201 *** |
| New towns developed before 1976                                       | 414         | 1.29.E-04 ***  | 1.39.E-02   | 2.05.E-47 ***  | 1.94.E-02   | 3.38.E-88 ***  |
| Landscape planning area                                               | 4775        | 6.38.E-40 ***  | 4.09.E-02   | 4.27.E-37 ***  | 3.59.E-02   | 2.65.E-28 ***  |
| Landscape emphasis planning area                                      | -6440       | 8.38.E-298 *** | -1.18.E-02  | 2.45.E-14 ***  | -1.34.E-02  | 1.35.E-17 ***  |
| Narrow                                                                | -           | -              | -           | -              | -           | -              |
| Medium                                                                | 5310        | 0.00.E+00 ***  | 5.61.E-02   | 0.00.E+00 ***  | 5.21.E-02   | 0.00.E+00 ***  |
| Wide                                                                  | 11671       | 0.00.E+00 ***  | 1.38.E-01   | 0.00.E+00 ***  | 1.33.E-01   | 0.00.E+00 ***  |
| UGUL                                                                  | 17343       | 2.23.E-38 ***  | 1.96.E-01   | 4.68.E-79 ***  | 8.96.E-02   | 2.77.E-15 ***  |
| Neighborhood                                                          | 8184        | 1.39.E-184 *** | 8.92.E-02   | 8.04.E-276 *** | 8.65.E-02   | 1.36.E-253 *** |
| (Medium)                                                              | -2561       | 2.57.E-02 *    | -6.03.E-02  | 4.25.E-09 ***  | -5.24.E-02  | 4.52.E-07 ***  |
| (Wide)                                                                | -7678       | 4.60.E-04 ***  | -1.14.E-01  | 2.01.E-09 ***  | -1.12.E-01  | 6.66.E-09 ***  |
| Hokkaido                                                              | -12374      | 3.32.E-03 **   | -           | -              | 1.13.E-01   | 2.58.E-03 **   |
| Ibaraki                                                               | -21608      | 1.84.E-05 ***  | -1.83.E-01  | 3.91.E-05 ***  | -8.84.E-02  | 5.08.E-02      |
| Tochigi                                                               | -20181      | 1.87.E-08 ***  | -1.52.E-01  | 1.41.E-06 ***  | -           | -              |
| Saitama                                                               | -           | -              | -           | -              | 8.72.E-02   | 3.64.E-04 ***  |
| Chiba                                                                 | -5954       | 1.19.E-03 **   | -           | -              | 1.07.E-01   | 2.87.E-11 ***  |
| Tokyo                                                                 | 4810        | 2.11.E-03 **   | -1.23.E-01  | 4.82.E-22 ***  | -3.44.E-02  | 1.15.E-02 *    |
| (The Kanagawa                                                         | -           | -              | -           | -              | -           | -              |
| prefecture Nigata                                                     | -9602       | 1.54.E-04 ***  | 4.95.E-02   | 2.33.E-02 *    | 1.48.E-01   | 5.46.E-11 ***  |
| dummy of Gifu                                                         | -           | -              | -           | -              | 1.87.E-01   | 3.60.E-06 ***  |
| Aichi                                                                 | -15315      | 2.47.E-04 ***  | -1.54.E-01  | 2.59.E-05 ***  | -           | -              |
| Mie                                                                   | -           | -              | 1.16.E-01   | 2.04.E-03 **   | 1.95.E-01   | 3.53.E-07 ***  |
| Kyoto                                                                 | 7184        | 8.60.E-04 ***  | 5.82.E-02   | 1.48.E-03 **   | 1.62.E-01   | 1.90.E-17 ***  |
| Osaka                                                                 | -           | -              | -5.93.E-02  | 1.06.E-02 *    | -           | -              |
| Hyogo                                                                 | -7962       | 9.08.E-04 ***  | -9.26.E-02  | 5.66.E-06 ***  | -           | -              |
| Fukuoka                                                               | 6694        | 1.88.E-02 *    | 1.47.E-01   | 2.52.E-09 ***  | 2.39.E-01   | 3.86.E-21 ***  |
| Sample size                                                           | 868,007     |                | 868,007     |                | 868,007     |                |
| R-squared                                                             | 0.931       |                | 0.937       |                | 0.936       |                |
| P value of F-Statistic                                                | 2.20E-16    |                | 2.20E-16    |                | 2.20E-16    |                |
